# Supplementary material for: Recombinant frizzled1 protein attenuated cardiac hypertrophy after myocardial infarction via the canonical Wnt signaling pathway
Source: PubMed Central journal article supplement (PMC5790446; doi:10.18632/oncotarget.23149), 2017-12-12
Supplement: oncotarget-09-3069-s001.pdf [file oncotarget-09-3069-s001.pdf]

# Recombinant frizzled1 protein attenuated cardiac hypertrophy after myocardial infarction via the canonical Wnt signaling pathway

## SUPPLEMENTARY MATERIALS

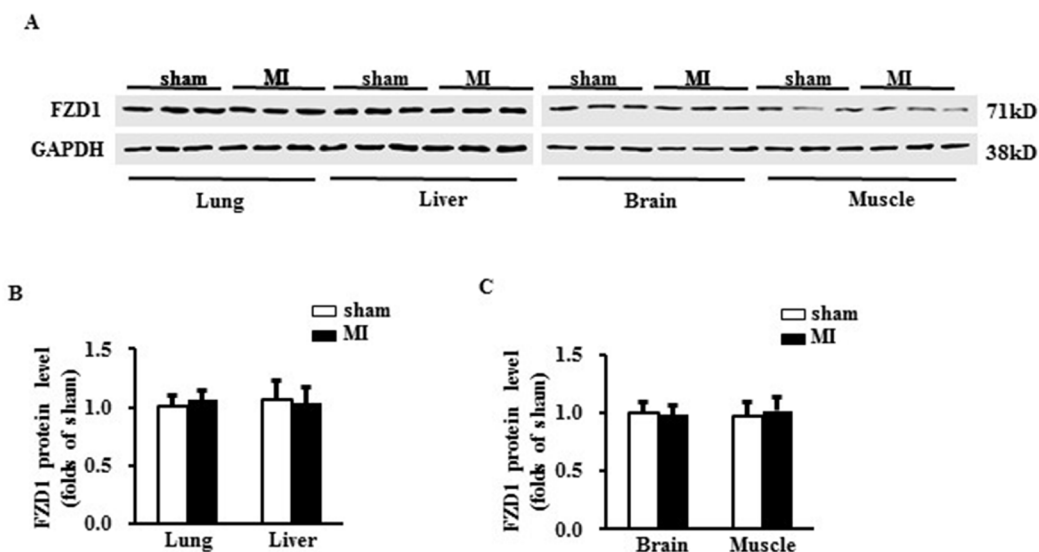

**Supplementary Figure 1:** (A) Representative western blots and (B, C) the quantitative result of the expression of FZD1 in the mouse left ventricle before and one week after LAD ligation. *N* = 5 independent experiments in all groups. All data are expressed as mean ± S.E.M.

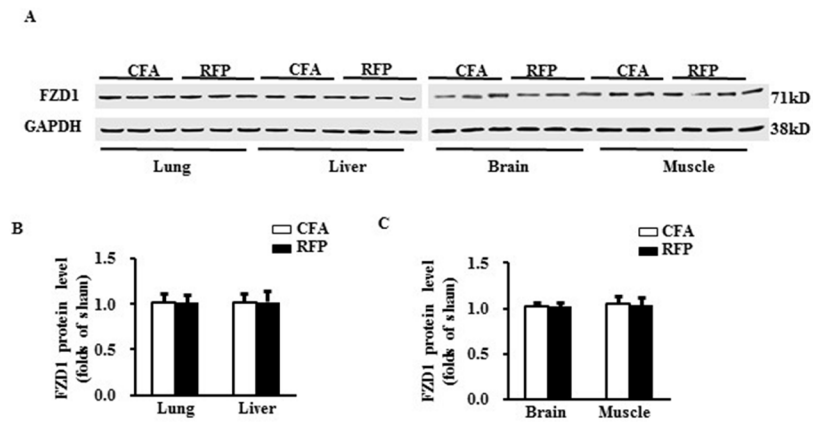

**Supplementary Figure 2:** (A) Representative western blots and (B, C) the quantitative result of the expression of FZD1 in the left ventricles of the MI mice before and after the treatment of RFP.  $N = 5$  independent experiments in all groups. All data are expressed as mean  $\pm$  S.E.M.
